# Supplementary material for: Simulating carbon and water fluxes using a coupled process-based terrestrial biosphere model and joint assimilation of leaf area index and surface soil moisture
Source: Copernicus journal article supplement (doi:10.5194/hess-26-6311-2022), 2022-12-16
Supplement: Supplementary file 1 [file hess-26-6311-2022-supplement.pdf]

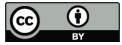

*Supplement of*

**Simulating carbon and water fluxes using a coupled process-based terrestrial biosphere model and joint assimilation of leaf area index and surface soil moisture**

**Sinan Li et al.**

*Correspondence to:* Li Zhang ([zhangli@aircas.ac.cn](mailto:zhangli@aircas.ac.cn)) and Jingfeng Xiao ([j.xiao@unh.edu](mailto:j.xiao@unh.edu))

The copyright of individual parts of the supplement might differ from the article licence.

Supplement Materials :

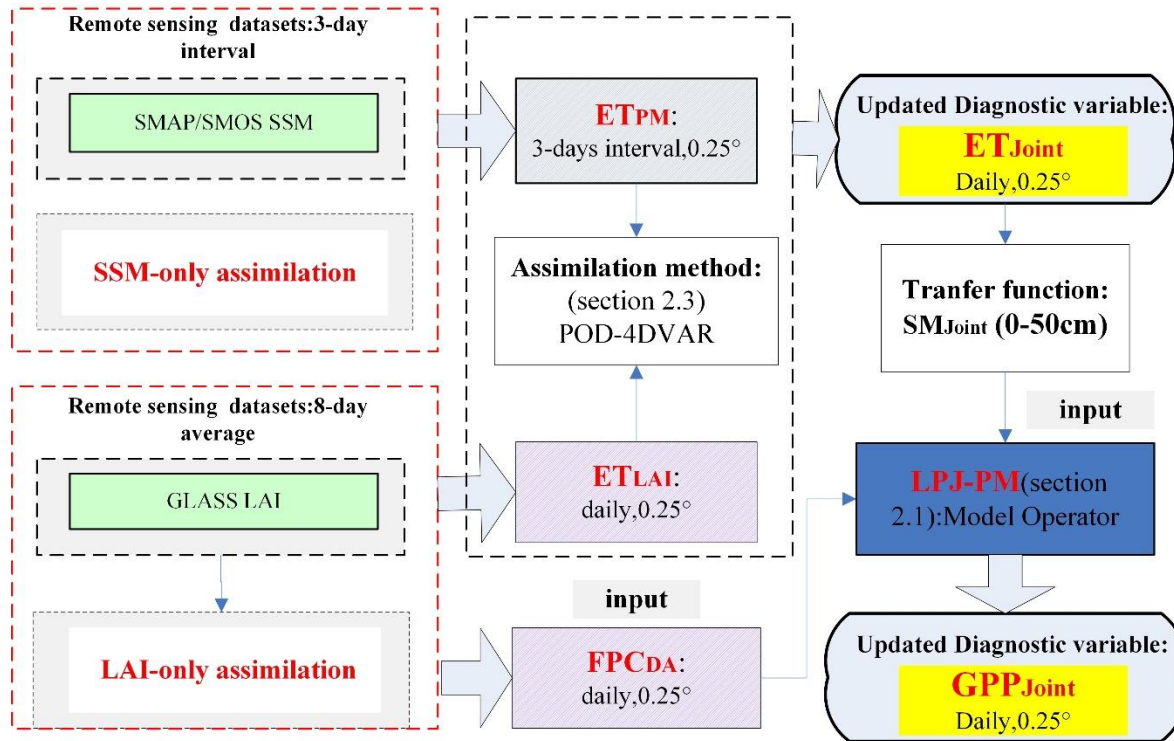

Figure S1. Flowchart of LPJ-VSJA assimilation scheme 3: joint assimilation of LAI and ET.

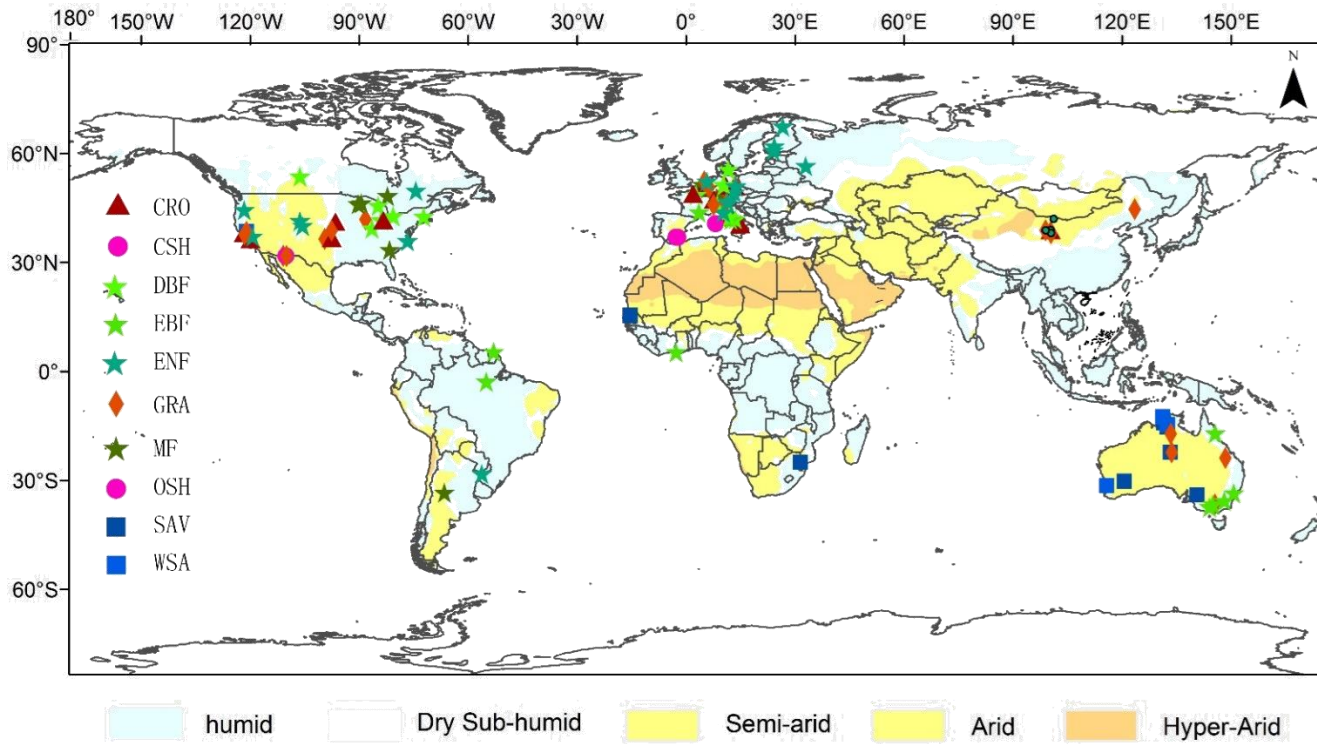

[Fig. S2](#) Flux sites (from Fluxnet2015) for evaluation of GPP and ET simulations (section 3.1 ).

Global distribution of ecosystems determined by the UNEP classification system. (Middleton and Thomas (1997))

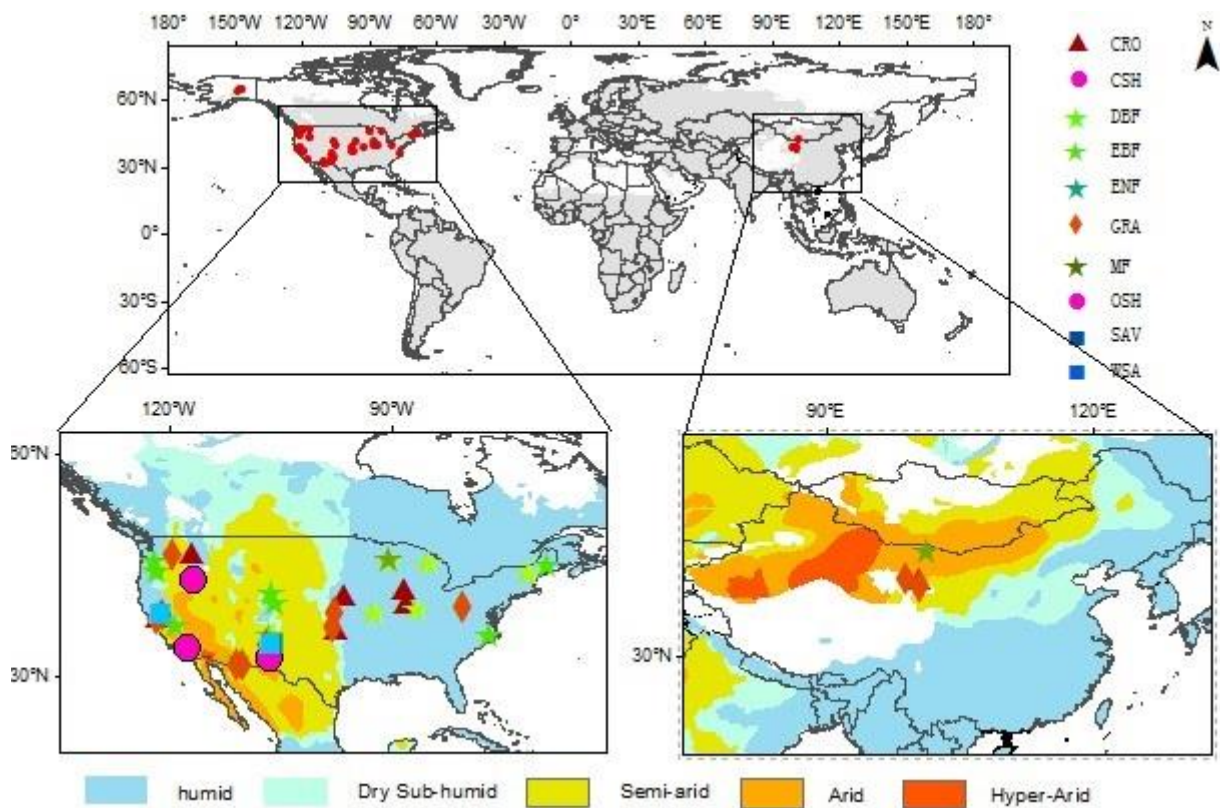

Fig. S3 Flux sites (Americasflux and HeiHe) for evaluation of ET assimilation based on different soil moisture data.

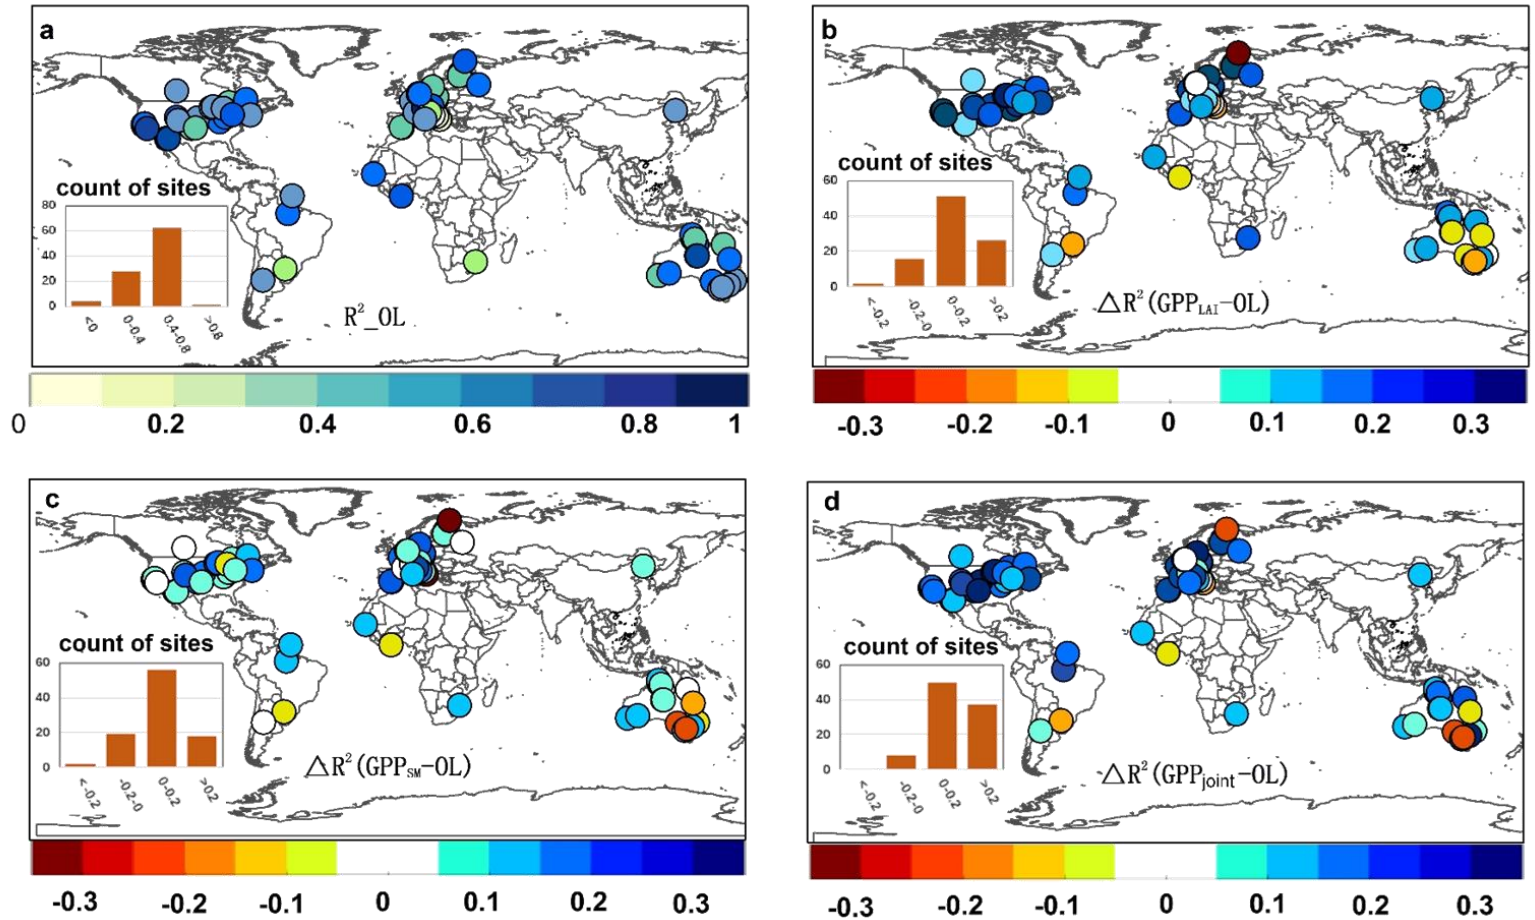

**Fig. S4** (a) The squared correlation coefficient ( $R^2$ ) between the GPP<sub>LPJ</sub> and the site observations, the yellow/blue indicating low/high correlation ; (b)  $\Delta R^2$ (difference between GPP<sub>LAI</sub> and GPP<sub>LPJ</sub>); (c)  $\Delta R^2$  (difference between GPP<sub>SM</sub> and GPP<sub>LPJ</sub>) ; (d)  $\Delta R^2$  (difference between GPP<sub>Joint</sub> and GPP<sub>LPJ</sub>) , blue/red represent positive/negative values.

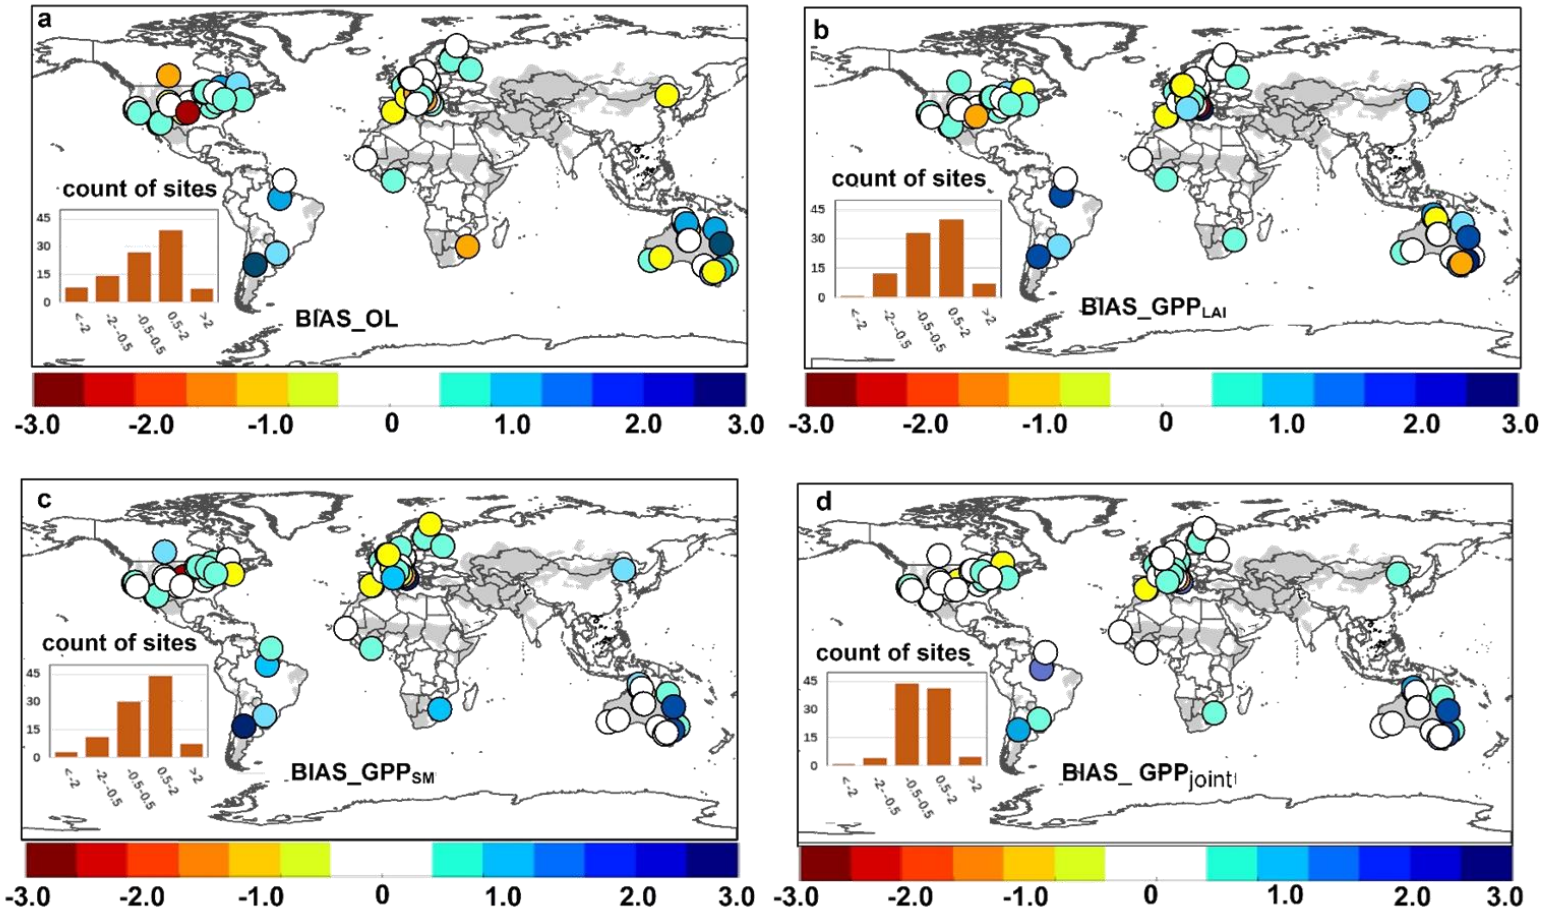

**Fig. S5** (a) The BIAS between the  $GPP_{LPJ}$  and the site observations; (b) BIAS ( $GPP_{LAI}$ ); (c) BIAS ( $GPP_{SM}$ ); (d)  $\Delta$  BIAS ( $GPP_{joint}$ ), blue/red represent positive/negative value.

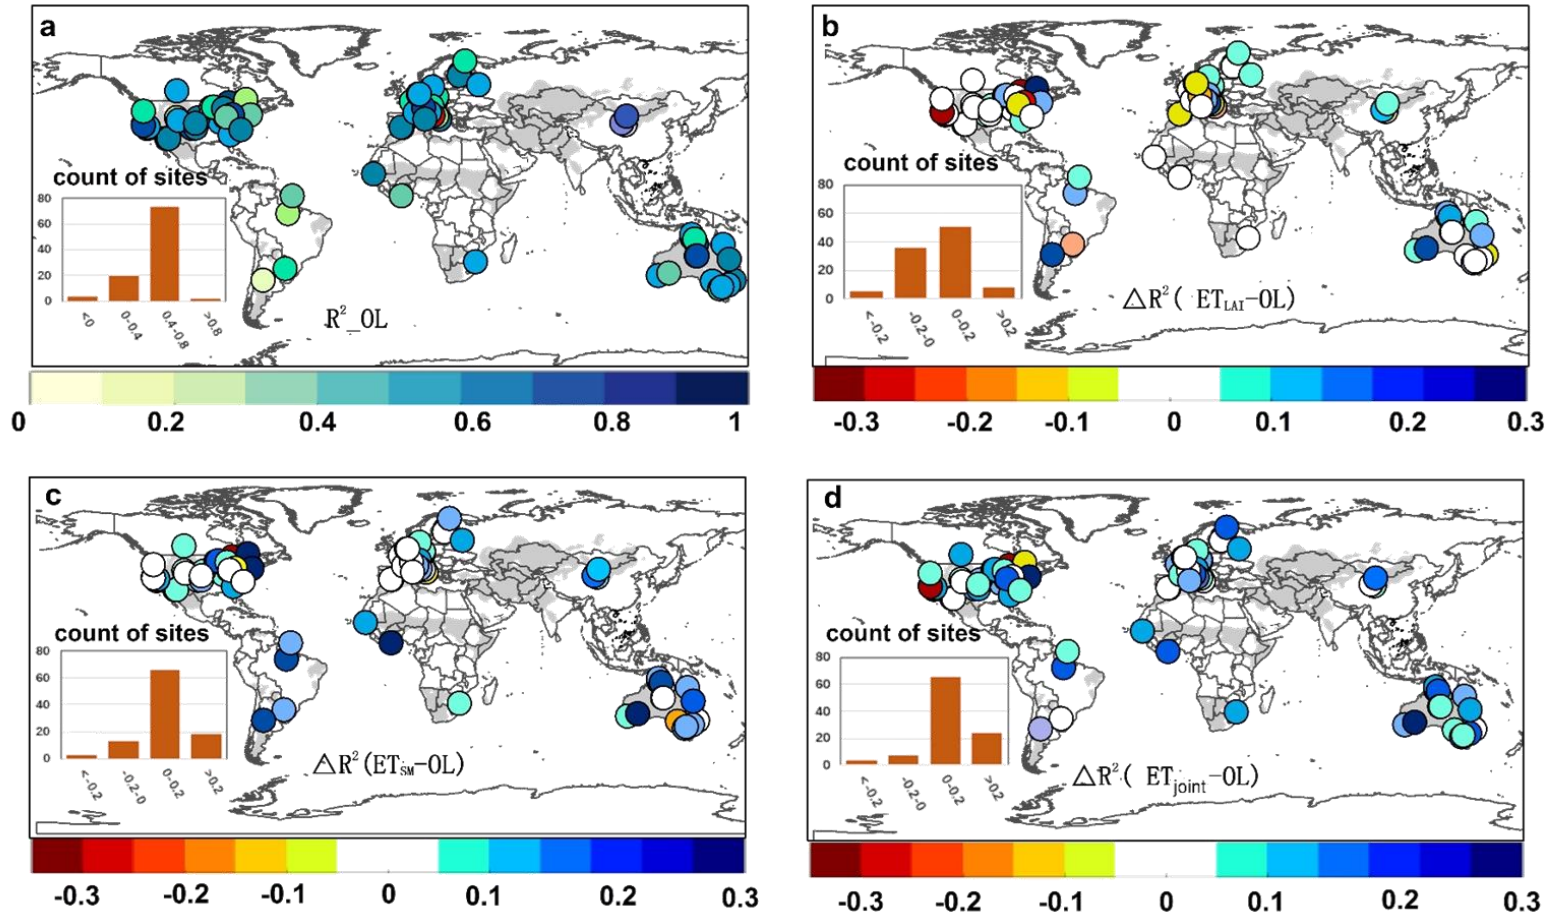

**Figure S6** (a) The squared correlation coefficient between the ET simulated by the LPJ-DGVM and the site observations, with yellow/blue indicating low/high correlation; (b)  $\Delta R^2$ (difference between  $ET_{LAI}$  and  $ET_{LPJ}$ );(c)  $\Delta R^2$  (difference between  $ET_{SM}$  and  $ET_{LPJ}$ ) ; (d)  $\Delta R^2$  (difference between  $ET_{Joint}$  and  $ET_{LPJ}$ ) , blue/red represent positive/negative value.

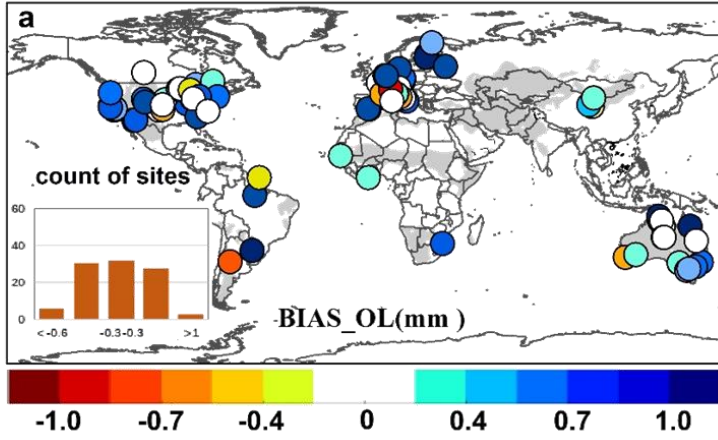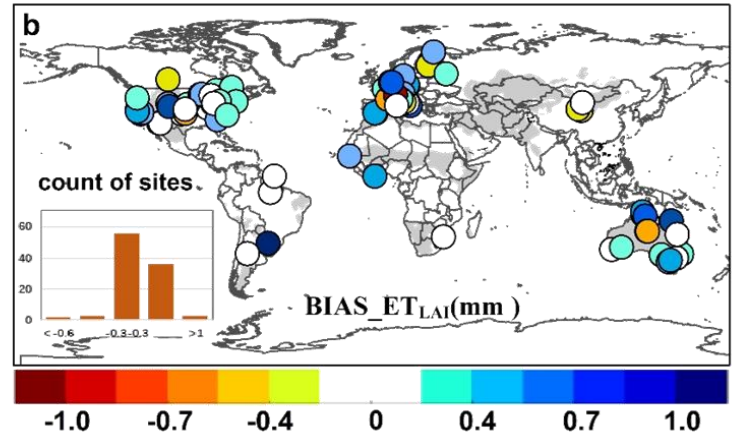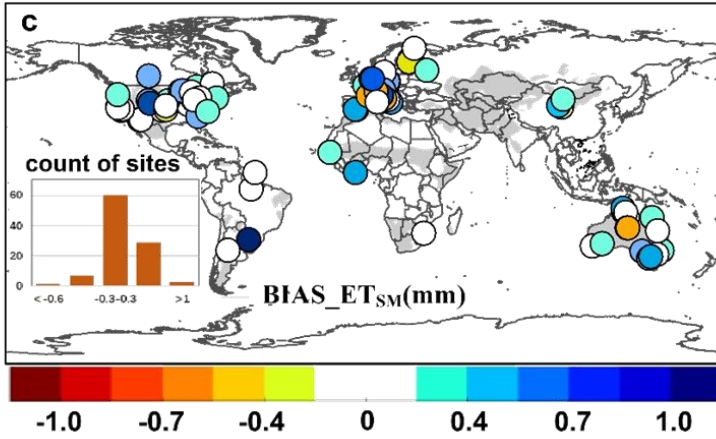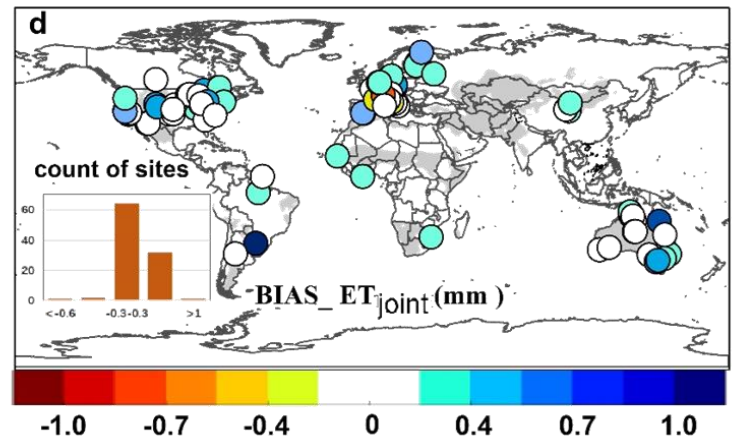

**Figure S7** (a) The BIAS between the ET simulated by the LPJ-DGVM and the site observations; (b) BIAS ( $ET_{LAI}$ ); (c) BIAS ( $ET_{SM}$ ); (d)  $\Delta$ BIAS ( $ET_{Joint}$ ), blue/red represent positive/negative value.



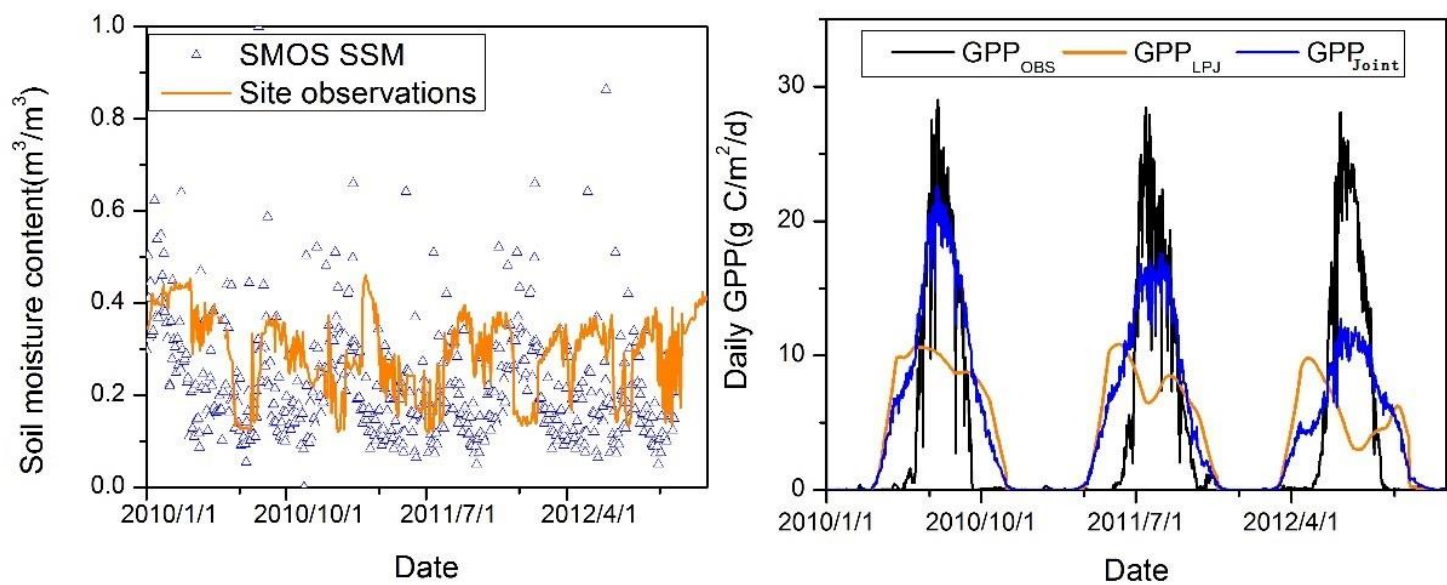

Figure S8 Soil moisture data and daily GPP during 2010-2012 at US-Ne1 site.

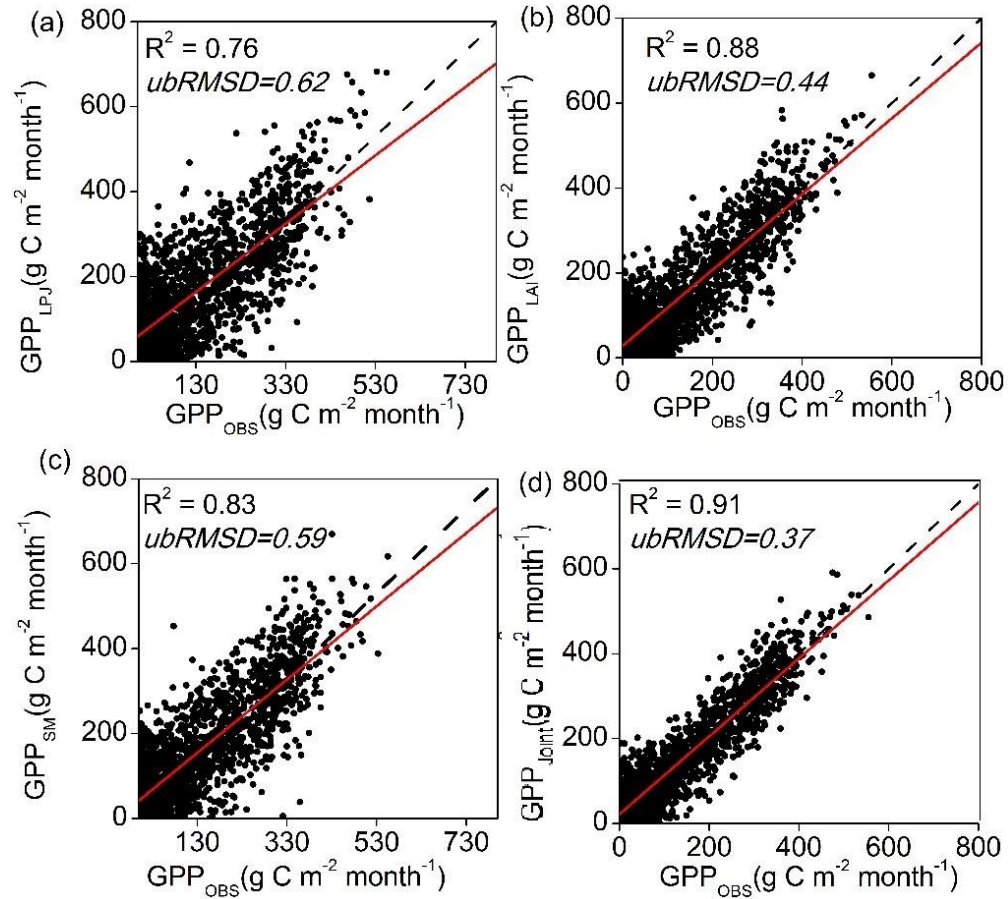

**Fig. S9** Scatter plots of monthly observed vs. simulated GPP. GPP<sub>LPJ</sub> (a), GPP<sub>LAI</sub> (b), GPP<sub>SM</sub> (c) GPP<sub>joint</sub> (d) for the period of 2010-2014 at site level.

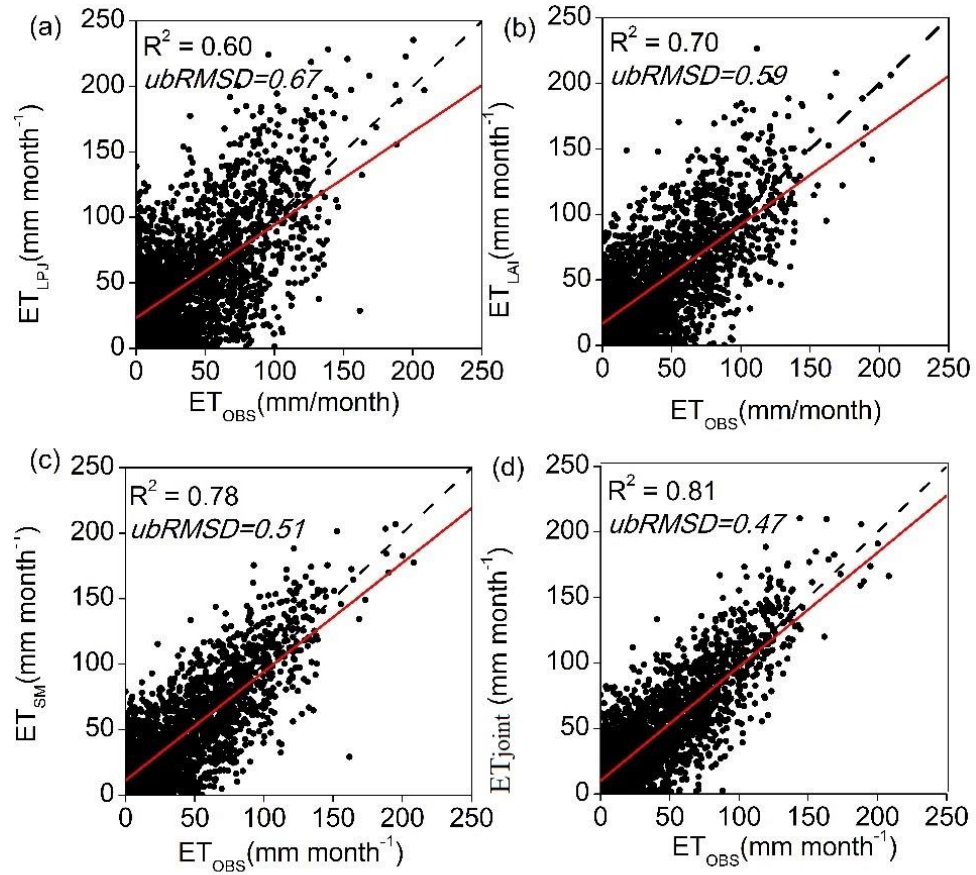

**Fig.S10** Scatter plots of monthly observed vs. simulated ET. ET<sub>LPJ</sub> (a), ET<sub>LAI</sub>(b), ET<sub>SM</sub> (c) ET<sub>joint</sub> (d) for the period of 2010-2014 at site level.

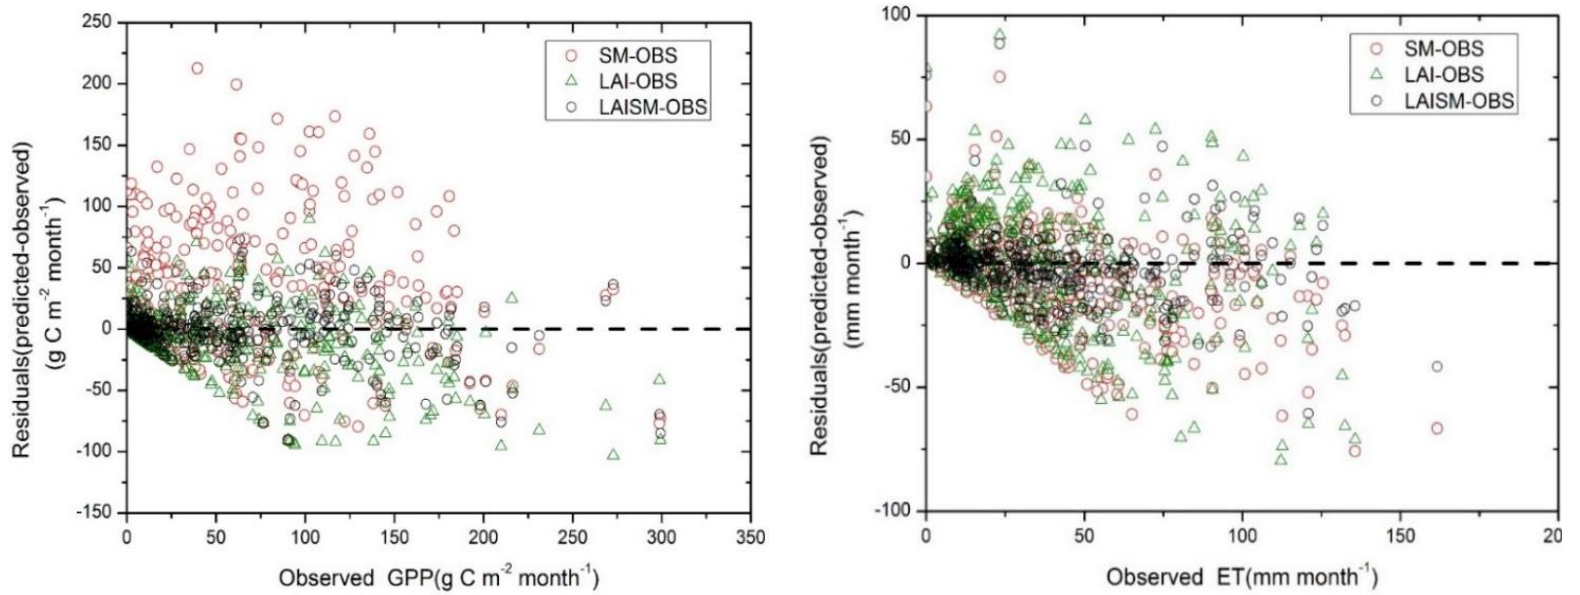

Fig. S11 Scatterplot of the monthly observed GPP (left graph) and ET values (right graph) vs. the difference of their simulations and observations. In the map,  $\text{GPP}_{\text{LAI}} - \text{GPP}_{\text{OBS}}$  and  $\text{ET}_{\text{LAI}} - \text{ET}_{\text{OBS}}$  (green triangle),  $\text{GPP}_{\text{SM}} - \text{GPP}_{\text{OBS}}$  and  $\text{ET}_{\text{SM}} - \text{ET}_{\text{OBS}}$  (red hollow circle), and  $\text{GPP}_{\text{joint}} - \text{GPP}_{\text{OBS}}$  and  $\text{ET}_{\text{joint}} - \text{ET}_{\text{OBS}}$  (black hollow circle)

**Table S1** Flux tower information for global FLUXNET2015, Ameriflux and Heihe dataset sites used in this study.

| Source      | ID | SITE   | LAT      | LON      | IGBP | Validation |
|-------------|----|--------|----------|----------|------|------------|
| FLUXNET2015 | 1  | CA-TPD | 42.63533 | -80.5577 | DBF  | GPP, ET    |
| FLUXNET2015 | 2  | DE-Lnf | 51.32822 | 10.3678  | DBF  | GPP, ET    |
| FLUXNET2015 | 3  | FR-Fon | 48.47636 | 2.7801   | DBF  | GPP, ET    |
| FLUXNET2015 | 4  | CA-Oas | 53.62889 | -106.198 | DBF  | GPP, ET    |
| FLUXNET2015 | 5  | IT-CA1 | 42.38041 | 12.02656 | DBF  | GPP, ET    |
| FLUXNET2015 | 6  | IT-Col | 41.84936 | 13.58814 | DBF  | GPP, ET    |
| FLUXNET2015 | 7  | IT-Isp | 45.81264 | 8.63358  | DBF  | GPP, ET    |
| FLUXNET2015 | 8  | IT-Ro2 | 42.39026 | 11.92093 | DBF  | GPP, ET    |
| FLUXNET2015 | 9  | US-Ha1 | 42.5378  | -72.1715 | DBF  | GPP, ET    |
| FLUXNET2015 | 10 | US-MMS | 39.3232  | -86.4131 | DBF  | GPP, ET    |
| FLUXNET2015 | 11 | DK-Sor | 55.48587 | 11.64464 | DBF  | GPP, ET    |
| FLUXNET2015 | 12 | US-Oho | 41.5545  | -83.8438 | DBF  | GPP, ET    |
| FLUXNET2015 | 13 | US-UMB | 45.5598  | -84.7138 | DBF  | GPP, ET    |
| FLUXNET2015 | 14 | DE-Hai | 51.07921 | 10.45217 | DBF  | GPP        |

|             |    |        |          |          |     |         |
|-------------|----|--------|----------|----------|-----|---------|
| FLUXNET2015 | 15 | AU-Whr | -36.6732 | 145.0294 | EBF | GPP, ET |
| FLUXNET2015 | 16 | AU-Cum | -33.6152 | 150.7236 | EBF | GPP, ET |
| FLUXNET2015 | 17 | AU-Rob | -17.1175 | 145.6301 | EBF | GPP, ET |
| FLUXNET2015 | 18 | AU-Tum | -35.6566 | 148.1517 | EBF | GPP, ET |
| FLUXNET2015 | 19 | AU-Wom | -37.4222 | 144.0944 | EBF | GPP, ET |
| FLUXNET2015 | 20 | BR-Sal | -2.85667 | -54.9589 | EBF | GPP, ET |
| FLUXNET2015 | 21 | FR-Pue | 43.7413  | 3.5957   | EBF | GPP, ET |
| FLUXNET2015 | 22 | GF-Guy | 5.27877  | -52.9249 | EBF | GPP, ET |
| FLUXNET2015 | 23 | GH-Ank | 5.26854  | -2.69421 | EBF | GPP, ET |
| FLUXNET2015 | 24 | CH-Dav | 46.81533 | 9.85591  | ENF | GPP, ET |
| FLUXNET2015 | 25 | IT-SRo | 43.72786 | 10.28444 | ENF | GPP, ET |
| FLUXNET2015 | 26 | DE-Lkb | 49.09962 | 13.30467 | ENF | GPP, ET |
| FLUXNET2015 | 27 | DE-Obe | 50.78666 | 13.72129 | ENF | GPP, ET |
| FLUXNET2015 | 28 | DE-Tha | 50.96256 | 13.56515 | ENF | GPP, ET |
| FLUXNET2015 | 29 | IT-SR2 | 43.73202 | 10.29091 | ENF | GPP, ET |
| FLUXNET2015 | 30 | FI-Hyy | 61.84741 | 24.29477 | ENF | GPP, ET |
| FLUXNET2015 | 31 | FI-Let | 60.64183 | 23.95952 | ENF | GPP, ET |
| FLUXNET2015 | 32 | NL-Loo | 52.16658 | 5.74356  | ENF | GPP, ET |
| FLUXNET2015 | 33 | RU-Fyo | 56.46153 | 32.92208 | ENF | GPP, ET |

|             |    |        |          |          |     |         |
|-------------|----|--------|----------|----------|-----|---------|
| FLUXNET2015 | 34 | US-NR1 | 40.0329  | -105.546 | ENF | GPP, ET |
| FLUXNET2015 | 35 | US-GLE | 41.36653 | -106.24  | ENF | GPP, ET |
| FLUXNET2015 | 36 | US-Me6 | 44.32328 | -121.608 | ENF | GPP, ET |
| FLUXNET2015 | 37 | US-NC3 | 35.799   | -76.656  | ENF | GPP, ET |
| FLUXNET2015 | 38 | FI-Sod | 67.36239 | 26.63859 | ENF | GPP, ET |
| FLUXNET2015 | 39 | IT-Lav | 45.9562  | 11.28132 | ENF | GPP, ET |
| FLUXNET2015 | 40 | IT-Ren | 46.58686 | 11.43369 | ENF | GPP, ET |
| FLUXNET2015 | 41 | AR-Vir | -28.2395 | -56.1886 | ENF | GPP, ET |
| FLUXNET2015 | 42 | CA-Qfo | 49.6925  | -74.3421 | ENF | GPP, ET |
| FLUXNET2015 | 43 | US-CZ2 | 37.03106 | -119.257 | ENF | GPP, ET |
| FLUXNET2015 | 44 | CA-TP1 | 42.66094 | -80.5595 | ENF | GPP, ET |
| FLUXNET2015 | 45 | BE-Bra | 51.30761 | 4.51984  | MF  | GPP, ET |
| FLUXNET2015 | 46 | AR-Slu | -33.4648 | -66.4598 | MF  | GPP, ET |
| FLUXNET2015 | 47 | BE-Vie | 50.30493 | 5.99812  | MF  | GPP, ET |
| FLUXNET2015 | 48 | CA-Gro | 48.2167  | -82.1556 | MF  | GPP, ET |
| FLUXNET2015 | 49 | CH-Lae | 47.47833 | 8.36439  | MF  | GPP, ET |
| FLUXNET2015 | 50 | US-PFa | 45.9459  | -90.2723 | MF  | GPP, ET |
| FLUXNET2015 | 51 | US-Syv | 46.242   | -89.3477 | MF  | GPP, ET |
| FLUXNET2015 | 52 | US-Akn | 33.3833  | -81.5656 | MF  | ET      |

|             |    |        |          |          |     |         |
|-------------|----|--------|----------|----------|-----|---------|
| FLUXNET2015 | 53 | AU-Emr | -23.8587 | 148.4746 | GRA | GPP, ET |
| FLUXNET2015 | 54 | US-AR1 | 36.4267  | -99.42   | GRA | GPP, ET |
| FLUXNET2015 | 55 | US-Wkg | 31.7365  | -109.942 | GRA | GPP, ET |
| FLUXNET2015 | 56 | US-Dia | 37.6773  | -121.53  | GRA | ET      |
| FLUXNET2015 | 57 | AT-Neu | 47.11667 | 11.3175  | GRA | GPP, ET |
| FLUXNET2015 | 58 | AU-Rig | -36.6499 | 145.5759 | GRA | GPP, ET |
| FLUXNET2015 | 59 | CH-Fru | 47.11583 | 8.53778  | GRA | GPP, ET |
| FLUXNET2015 | 60 | DE-Gri | 50.95004 | 13.51259 | GRA | GPP, ET |
| FLUXNET2015 | 61 | DE-RuR | 50.62191 | 6.30413  | GRA | GPP, ET |
| FLUXNET2015 | 62 | IT-MBo | 46.01468 | 11.04583 | GRA | GPP, ET |
| FLUXNET2015 | 63 | IT-Tor | 45.84444 | 7.57806  | GRA | GPP, ET |
| FLUXNET2015 | 64 | NL-Hor | 52.24035 | 5.0713   | GRA | GPP, ET |
| FLUXNET2015 | 65 | US-IB2 | 41.84062 | -88.241  | GRA | GPP, ET |
| FLUXNET2015 | 66 | US-Var | 38.4133  | -120.951 | GRA | GPP, ET |
| FLUXNET2015 | 67 | US-KLS | 38.7745  | -97.5684 | GRA | GPP, ET |
| FLUXNET2015 | 68 | AU-Stp | -17.1507 | 133.3502 | GRA | GPP, ET |
| FLUXNET2015 | 69 | AU-TTE | -22.287  | 133.64   | GRA | GPP, ET |
| FLUXNET2015 | 70 | US-SRG | 31.78938 | -110.828 | GRA | GPP, ET |
| FLUXNET2015 | 71 | CN-Cng | 44.5934  | 123.5092 | GRA | GPP     |



|             |    |        |          |          |     |         |
|-------------|----|--------|----------|----------|-----|---------|
| FLUXNET2015 | 72 | IT-Noe | 40.60618 | 8.15169  | CSH | GPP, ET |
| FLUXNET2015 | 73 | ES-Amo | 36.83361 | -2.25232 | OSH | GPP, ET |
| FLUXNET2015 | 74 | ES-LJu | 36.92659 | -2.75212 | OSH | GPP, ET |
| FLUXNET2015 | 75 | US-Whs | 31.7438  | -110.052 | OSH | GPP, ET |
| FLUXNET2015 | 76 | ZA-Kru | -25.0197 | 31.4969  | SAV | GPP, ET |
| FLUXNET2015 | 77 | AU-Cpr | -34.0021 | 140.5891 | SAV | GPP, ET |
| FLUXNET2015 | 78 | AU-DaS | -14.1593 | 131.3881 | SAV | GPP, ET |
| FLUXNET2015 | 79 | AU-Dry | -15.2588 | 132.3706 | SAV | GPP, ET |
| FLUXNET2015 | 80 | AU-ASM | -22.283  | 133.249  | SAV | GPP, ET |
| FLUXNET2015 | 81 | AU-GWW | -30.1913 | 120.6541 | SAV | GPP, ET |
| FLUXNET2015 | 82 | SN-Dhr | 15.40278 | -15.4322 | SAV | GPP, ET |
| FLUXNET2015 | 83 | AU-Gin | -31.3764 | 115.7138 | WSA | GPP, ET |
| FLUXNET2015 | 84 | AU-RDF | -14.5636 | 132.4776 | WSA | GPP, ET |
| FLUXNET2015 | 85 | AU-How | -12.4943 | 131.1523 | WSA | GPP, ET |
| FLUXNET2015 | 86 | US-Ton | 38.4316  | -120.966 | WSA | GPP, ET |
| FLUXNET2015 | 87 | US-CRT | 41.6285  | -83.3471 | CRO | GPP, ET |
| FLUXNET2015 | 88 | CH-Oe2 | 47.28642 | 7.73375  | CRO | GPP, ET |
| FLUXNET2015 | 89 | IT-BCi | 40.52375 | 14.95744 | CRO | GPP, ET |
| FLUXNET2015 | 90 | US-Twt | 38.10872 | -121.653 | CRO | GPP, ET |

|             |     |        |          |          |     |                                          |
|-------------|-----|--------|----------|----------|-----|------------------------------------------|
| FLUXNET2015 | 91  | US-Lin | 36.3566  | -119.842 | CRO | GPP, ET                                  |
| FLUXNET2015 | 92  | US-ARM | 36.6058  | -97.4888 | CRO | GPP, ET                                  |
| FLUXNET2015 | 93  | IT-CA2 | 42.37722 | 12.02604 | CRO | GPP, ET                                  |
| FLUXNET2015 | 94  | US-CRT | 41.6285  | -83.3471 | CRO | ET                                       |
| FLUXNET2015 | 95  | DE-Geb | 51.09973 | 10.91463 | CRO | GPP, ET                                  |
| FLUXNET2015 | 96  | BE-Lon | 50.55162 | 4.74623  | CRO | GPP, ET                                  |
| FLUXNET2015 | 97  | DE-Kli | 50.89306 | 13.52238 | CRO | GPP, ET                                  |
| FLUXNET2015 | 98  | US-Ne1 | 41.16506 | -96.4766 | CRO | GPP, ET                                  |
| FLUXNET2015 | 99  | FR-Gri | 48.84422 | 1.95191  | CRO | GPP, ET                                  |
| Ameriflux   | 100 | US-CF1 | 46.7815  | -117.082 | CRO | ET <sub>SMOS</sub> vs ET <sub>SMAP</sub> |
| Ameriflux   | 101 | US-IB1 | 41.8593  | -88.2227 | CRO | ET <sub>SMOS</sub> vs ET <sub>SMAP</sub> |
| Ameriflux   | 102 | US-Ne2 | 41.16487 | -96.4701 | CRO | ET <sub>SMOS</sub> vs ET <sub>SMAP</sub> |
| Ameriflux   | 103 | US-UiA | 40.06463 | -88.1961 | CRO | ET <sub>SMOS</sub> vs ET <sub>SMAP</sub> |
| HeiHe       | 104 | Daman  | 38.855   | 100.3717 | CRO | ET <sub>SMOS</sub> vs ET <sub>SMAP</sub> |
| Ameriflux   | 105 | US-RIs | 43.1439  | -116.736 | CSH | ET <sub>SMOS</sub> vs ET <sub>SMAP</sub> |
| Ameriflux   | 106 | US-Bar | 44.0646  | -71.2881 | DBF | ET <sub>SMOS</sub> vs ET <sub>SMAP</sub> |
| Ameriflux   | 107 | US-MOz | 38.7441  | -92.2    | DBF | ET <sub>SMOS</sub> vs ET <sub>SMAP</sub> |
| Ameriflux   | 108 | US-Rpf | 65.1198  | -147.429 | DBF | ET <sub>SMOS</sub> vs ET <sub>SMAP</sub> |
| Ameriflux   | 109 | US-WCr | 45.8059  | -90.0799 | DBF | ET <sub>SMOS</sub> vs ET <sub>SMAP</sub> |

|           |     |           |          |          |     |                                          |
|-----------|-----|-----------|----------|----------|-----|------------------------------------------|
| Ameriflux | 110 | US-CZ2    | 37.03106 | -119.257 | ENF | ET <sub>SMOS</sub> VS ET <sub>SMAP</sub> |
| Ameriflux | 111 | US-Ho1    | 45.2041  | -68.7402 | ENF | ET <sub>SMOS</sub> VS ET <sub>SMAP</sub> |
| Ameriflux | 112 | US-Me6    | 44.32328 | -121.608 | ENF | ET <sub>SMOS</sub> VS ET <sub>SMAP</sub> |
| Ameriflux | 113 | US-MtB    | 32.41667 | -110.726 | ENF | ET <sub>SMOS</sub> VS ET <sub>SMAP</sub> |
| Ameriflux | 114 | US-NC3    | 35.799   | -76.656  | ENF | ET <sub>SMOS</sub> VS ET <sub>SMAP</sub> |
| Ameriflux | 115 | US-Prr    | 65.12367 | -147.488 | ENF | ET <sub>SMOS</sub> VS ET <sub>SMAP</sub> |
| Ameriflux | 116 | US-Uaf    | 64.86627 | -147.856 | ENF | ET <sub>SMOS</sub> VS ET <sub>SMAP</sub> |
| Ameriflux | 117 | US-Vcm    | 35.88845 | -106.532 | ENF | ET <sub>SMOS</sub> VS ET <sub>SMAP</sub> |
| Ameriflux | 118 | US-Wrc    | 45.8205  | -121.952 | ENF | ET <sub>SMOS</sub> VS ET <sub>SMAP</sub> |
| Ameriflux | 119 | US-A32    | 36.81927 | -97.8198 | GRA | ET <sub>SMOS</sub> VS ET <sub>SMAP</sub> |
| Ameriflux | 120 | US-Hn2    | 46.68886 | -119.464 | GRA | ET <sub>SMOS</sub> VS ET <sub>SMAP</sub> |
| Ameriflux | 121 | US-JRn    | 39.67886 | -80.1646 | GRA | ET <sub>SMOS</sub> VS ET <sub>SMAP</sub> |
| Ameriflux | 122 | US-KLS    | 38.7745  | -97.5684 | GRA | ET <sub>SMOS</sub> VS ET <sub>SMAP</sub> |
| Ameriflux | 123 | US-Seg    | 34.3623  | -106.702 | GRA | ET <sub>SMOS</sub> VS ET <sub>SMAP</sub> |
| Ameriflux | 124 | US-Sne    | 38.0369  | -121.755 | GRA | ET <sub>SMOS</sub> VS ET <sub>SMAP</sub> |
| HeiHe     | 125 | Arou      | 38.05    | 100.45   | GRA | ET <sub>SMOS</sub> VS ET <sub>SMAP</sub> |
| HeiHe     | 126 | Dashalong | 38.8399  | 98.94    | GRA | ET <sub>SMOS</sub> VS ET <sub>SMAP</sub> |
| HeiHe     | 127 | Hunhelin  | 41.99    | 101.1335 | MF  | ET <sub>SMOS</sub> VS ET <sub>SMAP</sub> |
| Ameriflux | 128 | US-EML    | 63.8784  | -149.254 | OSH | ET <sub>SMOS</sub> VS ET <sub>SMAP</sub> |

|           |     |        |          |          |     |                                          |
|-----------|-----|--------|----------|----------|-----|------------------------------------------|
| Ameriflux | 129 | US-Jo2 | 32.58494 | -106.603 | OSH | ET <sub>SMOS</sub> VS ET <sub>SMAP</sub> |
| Ameriflux | 130 | US-Rws | 43.16755 | -116.713 | OSH | ET <sub>SMOS</sub> VS ET <sub>SMAP</sub> |
| Ameriflux | 131 | US-SCs | 33.73433 | -117.696 | OSH | ET <sub>SMOS</sub> VS ET <sub>SMAP</sub> |
| Ameriflux | 132 | US-Wjs | 34.42549 | -105.862 | SAV | ET <sub>SMOS</sub> VS ET <sub>SMAP</sub> |
| Ameriflux | 133 | US-Mpj | 34.4385  | -106.238 | WSA | ET <sub>SMOS</sub> VS ET <sub>SMAP</sub> |

**Table S2** Statistics for daily GPP between observations and simulations by LPJ-DGVM and that of three assimilation schemes for different vegetation types in different regions. ←

| Humid and<br>dry-sub humid ← | R <sup>2</sup> ←     |                      |                     |                     | bias (mm/daily) ←    |                      |                     |                     | ubRMSE (mm/daily) ←  |                      |                     |                     |
|------------------------------|----------------------|----------------------|---------------------|---------------------|----------------------|----------------------|---------------------|---------------------|----------------------|----------------------|---------------------|---------------------|
|                              | GPP <sub>LPJ</sub> ← | GPP <sub>LAI</sub> ← | GPP <sub>SM</sub> ← | GPP <sub>CO</sub> ← | GPP <sub>LPJ</sub> ← | GPP <sub>LAI</sub> ← | GPP <sub>SM</sub> ← | GPP <sub>CO</sub> ← | GPP <sub>LPJ</sub> ← | GPP <sub>LAI</sub> ← | GPP <sub>SM</sub> ← | GPP <sub>CO</sub> ← |
| Forest ←                     | 0.38 ←               | 0.48 ←               | 0.46 ←              | 0.55 ←              | 0.56 ←               | 0.46 ←               | 0.47 ←              | 0.51 ←              | 2.14 ←               | 2.10 ←               | 1.91 ←              | 1.56 ←              |
| Grassland ←                  | 0.46 ←               | 0.57 ←               | 0.51 ←              | 0.61 ←              | 0.24 ←               | 0.40 ←               | 0.48 ←              | 0.65 ←              | 1.75 ←               | 1.55 ←               | 1.33 ←              | 0.81 ←              |
| Savanna ←                    | 0.34 ←               | 0.50 ←               | 0.52 ←              | 0.56 ←              | 0.13 ←               | 0.65 ←               | 0.66 ←              | 0.63 ←              | 2.15 ←               | 1.40 ←               | 1.17 ←              | 1.14 ←              |
| Shrubland ←                  | 0.47 ←               | 0.54 ←               | 0.58 ←              | 0.66 ←              | -0.37 ←              | 1.46 ←               | 1.99 ←              | 0.66 ←              | 1.21 ←               | 1.48 ←               | 0.81 ←              | 0.93 ←              |
| Cropland ←                   | 0.38 ←               | 0.53 ←               | 0.53 ←              | 0.65 ←              | -0.18 ←              | 0.64 ←               | 0.47 ←              | 0.72 ←              | 2.48 ←               | 2.29 ←               | 1.80 ←              | 1.69 ←              |
| <b>Average</b> ←             | <b>0.41</b> ←        | <b>0.53</b> ←        | <b>0.52</b> ←       | <b>0.61</b> ←       | <b>0.08</b> ←        | <b>0.72</b> ←        | <b>0.81</b> ←       | <b>0.63</b> ←       | <b>1.95</b> ←        | <b>1.76</b> ←        | <b>1.40</b> ←       | <b>1.23</b> ←       |
| Semi-arid and<br>Arid ←      | R <sup>2</sup> ←     |                      |                     |                     | bias (mm/daily) ←    |                      |                     |                     | ubRMSE (mm/daily) ←  |                      |                     |                     |
|                              | GPP <sub>LPJ</sub> ← | GPP <sub>LAI</sub> ← | GPP <sub>SM</sub> ← | GPP <sub>CO</sub> ← | GPP <sub>LPJ</sub> ← | GPP <sub>LAI</sub> ← | GPP <sub>SM</sub> ← | GPP <sub>CO</sub> ← | GPP <sub>LPJ</sub> ← | GPP <sub>LAI</sub> ← | GPP <sub>SM</sub> ← | GPP <sub>CO</sub> ← |
| Forest ←                     | 0.56 ←               | 0.62 ←               | 0.57 ←              | 0.73 ←              | -1.72 ←              | 0.34 ←               | 0.98 ←              | 0.30 ←              | 2.67 ←               | 1.72 ←               | 1.79 ←              | 1.32 ←              |
| Grassland ←                  | 0.64 ←               | 0.77 ←               | 0.72 ←              | 0.87 ←              | -0.54 ←              | 0.10 ←               | 0.41 ←              | 0.35 ←              | 1.83 ←               | 1.42 ←               | 1.41 ←              | 1.12 ←              |
| Savanna ←                    | 0.58 ←               | 0.69 ←               | 0.64 ←              | 0.75 ←              | -0.22 ←              | 0.84 ←               | 0.48 ←              | 0.59 ←              | 1.15 ←               | 1.02 ←               | 1.15 ←              | 0.83 ←              |
| Shrubland ←                  | 0.38 ←               | 0.43 ←               | 0.51 ←              | 0.59 ←              | -1.03 ←              | -0.67 ←              | -0.53 ←             | -0.19 ←             | 1.47 ←               | 1.46 ←               | 1.06 ←              | 0.87 ←              |
| Cropland ←                   | 0.59 ←               | 0.75 ←               | 0.57 ←              | 0.72 ←              | 1.72 ←               | 0.81 ←               | 0.65 ←              | 0.63 ←              | 2.24 ←               | 2.01 ←               | 1.73 ←              | 1.10 ←              |
| <b>Average</b> ←             | <b>0.55</b> ←        | <b>0.65</b> ←        | <b>0.59</b> ←       | <b>0.73</b> ←       | <b>-0.36</b> ←       | <b>0.28</b> ←        | <b>0.40</b> ←       | <b>0.34</b> ←       | <b>1.88</b> ←        | <b>1.53</b> ←        | <b>1.43</b> ←       | <b>1.05</b> ←       |

TableS3 Statistics for daily ET between observations and simulations by LPJ-DGVM and that of three assimilation schemes for different vegetation types in different regions.

| Humid and<br>dry-subhumid | R <sup>2</sup>    |                   |                  |                  | bias (mm/daily)   |                   |                  |                  | ubRMSE (mm/daily) |                   |                  |                  |
|---------------------------|-------------------|-------------------|------------------|------------------|-------------------|-------------------|------------------|------------------|-------------------|-------------------|------------------|------------------|
|                           | ET <sub>LPJ</sub> | ET <sub>LAJ</sub> | ET <sub>SM</sub> | ET <sub>CO</sub> | ET <sub>LPJ</sub> | ET <sub>LAJ</sub> | ET <sub>SM</sub> | ET <sub>CO</sub> | ET <sub>LPJ</sub> | ET <sub>LAJ</sub> | ET <sub>SM</sub> | ET <sub>CO</sub> |
| Forest                    | 0.39              | 0.45              | 0.53             | 0.52             | 0.38              | 0.22              | 0.29             | 0.29             | 0.88              | 0.95              | 0.87             | 0.68             |
| Grassland                 | 0.60              | 0.58              | 0.66             | 0.63             | 0.13              | 0.17              | 0.24             | 0.26             | 0.78              | 0.97              | 0.83             | 0.64             |
| Savanna                   | 0.54              | 0.62              | 0.68             | 0.68             | 0.56              | 0.21              | 0.34             | 0.30             | 0.96              | 1.03              | 0.82             | 0.59             |
| Shrubland                 | 0.65              | 0.65              | 0.68             | 0.80             | 0.10              | -0.06             | -0.06            | 0.11             | 1.22              | 1.42              | 0.78             | 0.65             |
| Cropland                  | 0.51              | 0.53              | 0.59             | 0.65             | 0.29              | 0.29              | 0.37             | 0.21             | 1.00              | 0.90              | 0.82             | 0.77             |
| Average                   | 0.54              | 0.56              | 0.63             | 0.66             | 0.29              | 0.17              | 0.24             | 0.23             | 0.97              | 1.05              | 0.83             | 0.67             |
| Semi-arid and<br>Arid     | R <sup>2</sup>    |                   |                  |                  | bias (mm/daily)   |                   |                  |                  | ubRMSE (mm/daily) |                   |                  |                  |
|                           | ET <sub>LPJ</sub> | ET <sub>LAJ</sub> | ET <sub>SM</sub> | ET <sub>CO</sub> | ET <sub>LPJ</sub> | ET <sub>LAJ</sub> | ET <sub>SM</sub> | ET <sub>CO</sub> | ET <sub>LPJ</sub> | ET <sub>LAJ</sub> | ET <sub>SM</sub> | ET <sub>CO</sub> |
| Forest                    | 0.45              | 0.47              | 0.56             | 0.59             | 0.33              | 0.35              | 0.27             | 0.31             | 0.77              | 1.05              | 0.80             | 0.71             |
| Grassland                 | 0.72              | 0.64              | 0.75             | 0.79             | 0.11              | -0.03             | -0.03            | -0.02            | 0.94              | 0.85              | 0.71             | 0.50             |
| Savanna                   | 0.65              | 0.70              | 0.65             | 0.77             | 0.34              | 0.28              | 0.24             | 0.18             | 0.85              | 0.91              | 0.77             | 0.56             |
| Shrubland                 | 0.56              | 0.58              | 0.66             | 0.62             | 0.13              | 0.17              | 0.10             | 0.17             | 0.81              | 0.94              | 0.65             | 0.69             |
| Cropland                  | 0.65              | 0.64              | 0.73             | 0.77             | 0.23              | -0.06             | -0.01            | 0.19             | 1.30              | 1.20              | 0.70             | 0.64             |
| Average                   | 0.60              | 0.62              | 0.67             | 0.71             | 0.23              | 0.14              | 0.11             | 0.14             | 0.93              | 0.99              | 0.72             | 0.61             |

**Table S4** Normal distribution parameters and interval estimation of error for GPP products simulated from our study and other cited.

| Dataset  | Estimator of $\mu$<br>(g C/m <sup>2</sup> /month) | confidence interval of $\mu$<br>( $\alpha=0.05$ ) | Estimator of $\sigma$ | confidence interval of $\sigma$<br>( $\alpha=0.05$ ) |
|----------|---------------------------------------------------|---------------------------------------------------|-----------------------|------------------------------------------------------|
| LPJ-VSJA | 4.7                                               | [4.65,4.88]                                       | 1.73                  | [1.22-1.97]                                          |
| LPJ-DGVM | 19.7                                              | [17.6,22.3]                                       | 5.23                  | [1.22-1.97]                                          |
| MODIS    | 25.4                                              | [23.9,29.6]                                       | 8.98                  | [8.34-9.22]                                          |
| GOSIF    | 8.3                                               | [8.1-8.5]                                         | 4.23                  | [4.11-4.56]                                          |
| GLASS    | 3.6                                               | [3.44-3.78]                                       | 3.17                  | [2.77-3.45]                                          |

**Table S5** Normal distribution parameter and interval estimation of error for ET products simulated from our study and other cited.

| Dataset  | Estimator of $\mu$<br>(mm/month) | confidence interval of $\mu$<br>( $\alpha=0.05$ ) | Estimator of $\sigma$ | confidence interval of $\sigma$<br>( $\alpha=0.05$ ) |
|----------|----------------------------------|---------------------------------------------------|-----------------------|------------------------------------------------------|
| LPJ-VSJA | 3.4                              | [3.15,3.74]                                       | 1.91                  | [1.55-2.05]                                          |
| LPJ-DGVM | 14.3                             | [11.8,17.1]                                       | 7.1                   | [6.6-7.85]                                           |
| MODIS    | 32.2                             | [31.9,33.6]                                       | 10.28                 | [9.34-11.22]                                         |
| GLDAS    | 4.3                              | [4.06-4.55]                                       | 2.23                  | [2.11-2.56]                                          |
| GLASS    | 10.2                             | [9.44-10.78]                                      | 5.3                   | [4.57-5.65]                                          |

GLEAM

4.13

[3.96-4.35]

3.75

[3.35-3.88]

---



**Table S6** Global annual gross primary productivity (GPP) and evaporation (ET) from different products and their estimation accuracy.

| Dataset  | GPP (Pg C/yr) | ET (km <sup>3</sup> /yr) | Period    | Accuracy derived from reference (site evaluation)                                          | Reference           |
|----------|---------------|--------------------------|-----------|--------------------------------------------------------------------------------------------|---------------------|
| Fluxcom  | ~125          | 86.0× 10 <sup>3</sup>    | 2010-2015 | GPP:2.83 g C/m <sup>2</sup> /d, R <sup>2</sup> =0.60                                       | Jung et al.,2020    |
| PML-V2   | 145.8         | 72.8 × 10 <sup>3</sup>   | 2003-2017 | ET:0.69 mm/d, R <sup>2</sup> =0.69<br>GPP:1.99 g C/m <sup>2</sup> /d, R <sup>2</sup> =0.79 | Zhang et al.,2019   |
| GLEAM    | ----          | 68 × 10 <sup>3</sup>     | 2010-2017 | ET:0.72 mm/d, R <sup>2</sup> =0.64                                                         | Martens et al.,2017 |
| MOD17A2H | ~110          | 58.9× 10 <sup>3</sup>    | 2001-2014 | ET:1.0 mm/d, R <sup>2</sup> =0.49<br>GPP:2.82 g C/m <sup>2</sup> /d, R <sup>2</sup> =0.59  | Zhang et al.,2019   |
| GOSIF    | 135.5         | -----                    | 2000-2017 | GPP:1.92 g C/m <sup>2</sup> /d, R <sup>2</sup> =0.74                                       | Li et al.,2019      |
| GLDAS-2  | ----          | 72.4 × 10 <sup>3</sup>   | 2010-2017 | ET:0.70 mm/d, R <sup>2</sup> =0.71                                                         | Jung et al.,2020    |
| GLASS    | ~108          | 72 × 10 <sup>3</sup>     | 2010-2018 | ET:1.0 mm/d, R <sup>2</sup> =0.49<br>GPP:1.74 g C/m <sup>2</sup> /d, R <sup>2</sup> =0.81  | Yao et al.,2014     |
| LPJ-VSJA | 130.2         | 69.2× 10 <sup>3</sup>    | 2010-2018 | ET:0.74 mm/d, R <sup>2</sup> =0.70<br>GPP:1.32 g C/m <sup>2</sup> /d, R <sup>2</sup> =0.70 | Our study           |
| LPJ-DGVM | 123           | 82× 10 <sup>3</sup>      | 2010-2018 | ET:1.10 mm/d, R <sup>2</sup> =0.58<br>GPP:2.23 g C/m <sup>2</sup> /d, R <sup>2</sup> =0.60 | Our study           |
